# Supplementary material
Source: Atypon-hosted journal article supplement (doi:10.1287/opre.2024.0994)

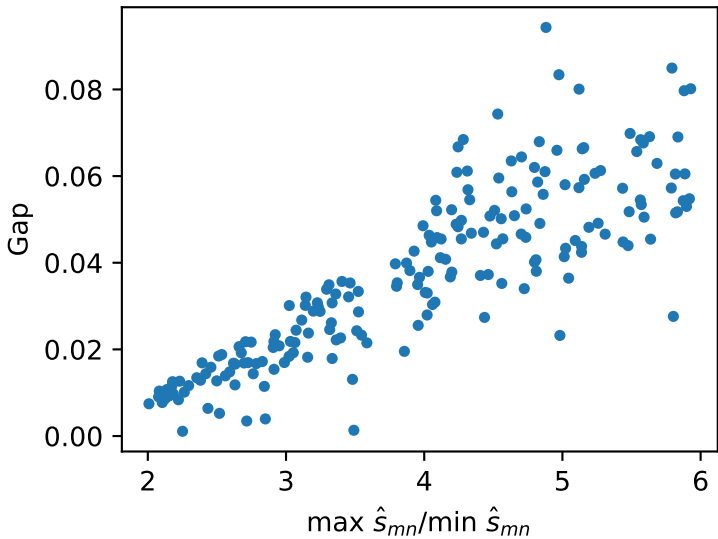

Supplement: opre.2024.0994.cd.zip [file gap_100_0.6.pdf › code_OR_inv_allocation/results/gap_100_0.6.pdf]

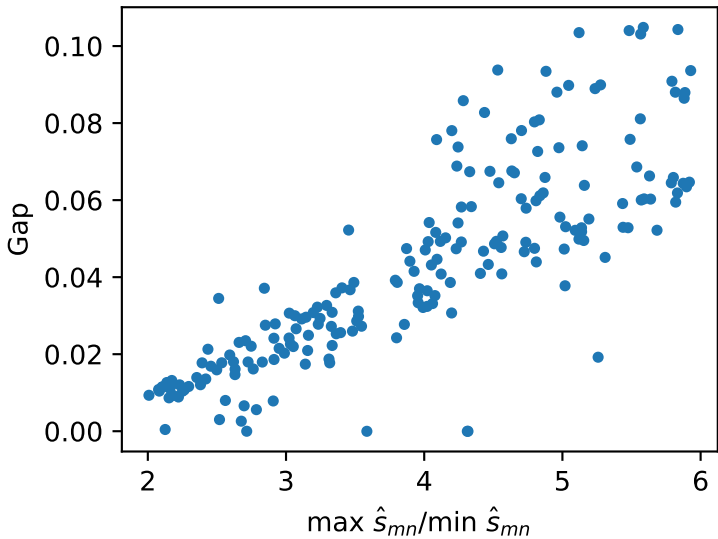

Supplement: opre.2024.0994.cd.zip [file gap_100_0.9.pdf › code_OR_inv_allocation/results/gap_100_0.9.pdf]

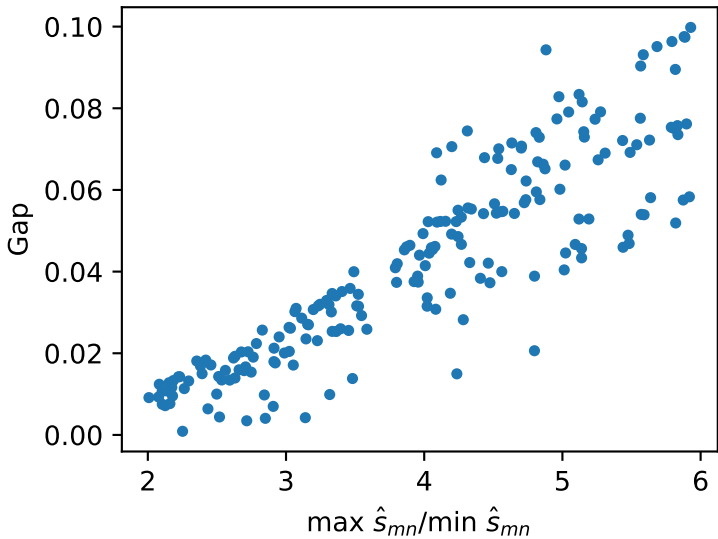

Supplement: opre.2024.0994.cd.zip [file gap_60_0.6.pdf › code_OR_inv_allocation/results/gap_60_0.6.pdf]

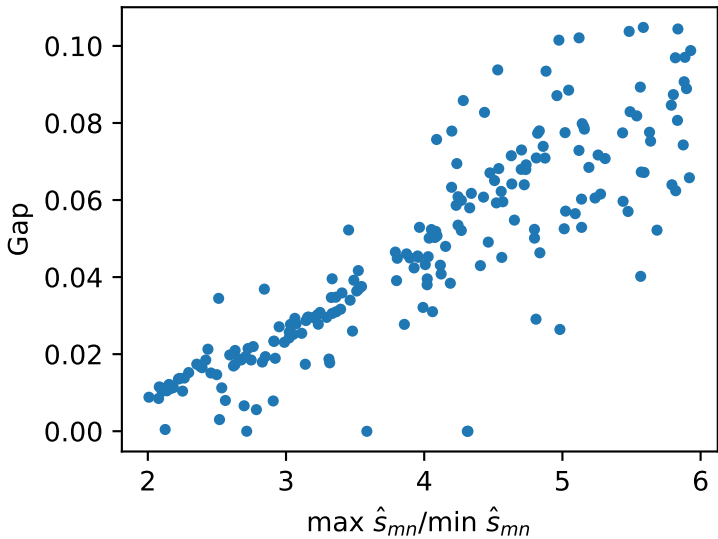

Supplement: opre.2024.0994.cd.zip [file gap_60_0.9.pdf › code_OR_inv_allocation/results/gap_60_0.9.pdf]

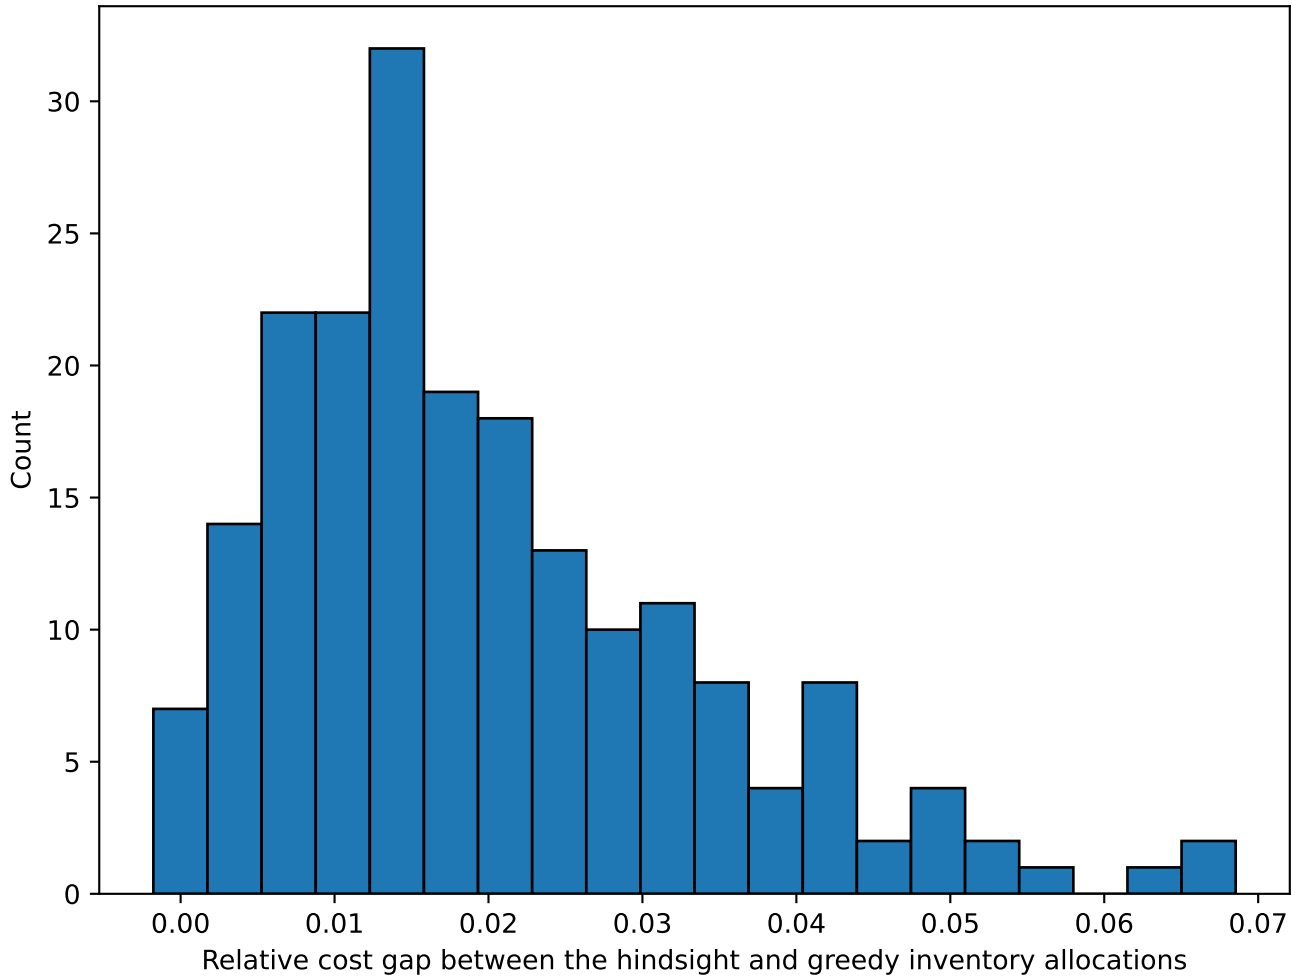

Supplement: opre.2024.0994.cd.zip [file mixed_distribution.pdf › code_OR_inv_allocation/results/mixed_distribution.pdf]
